# Supplementary material for: Dopamine Transporter, PhosphoSerine129 α-Synuclein and α-Synuclein Levels in Aged LRRK2 G2019S Knock-In and Knock-Out Mice
Source: MDPI journal article supplement (doi:10.3390/biomedicines10040881), 2022-04-12
Supplement: s1 [file s1]

# **Dopamine Transporter, PhosphoSerine129 $\alpha$ -Synuclein and $\alpha$ -Synuclein Levels in Aged LRRK2 G2019S Knock-In and Knock-Out Mice**

Chiara Domenicale <sup>1,#</sup>, Daniela Mercatelli <sup>1,2,#</sup>, Federica Albanese <sup>1</sup>, Salvatore Novello <sup>1,3</sup>, Fabrizio Vincenzi <sup>4</sup>, Katia Varani <sup>4</sup> and Michele Morari <sup>1,\*</sup>

<sup>1</sup> Department of Neuroscience and Rehabilitation, University of Ferrara, 44121 Ferrara, Italy

<sup>2</sup> Technopole of Ferrara, LTTA Laboratory for Advanced Therapies, 44121 Ferrara, Italy

<sup>3</sup> Laboratory of Molecular and Chemical Biology of Neurodegeneration, Brain Mind Institute, Ecole PolytechniqueFédérale de Lausanne (EPFL), CH-1015 Lausanne, Switzerland

<sup>4</sup> Department of Translational Medicine, University of Ferrara, 44121 Ferrara, Italy

\* Correspondence: m.morari@unife.it

# These Authors contributed equally to this work.

## **Supplementary materials**

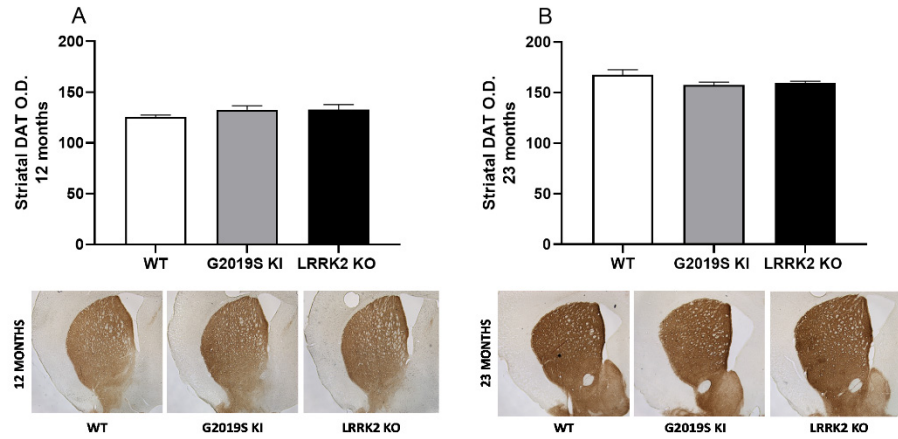

**Figure S1.** DAT immunoreactivity in striatal slices of 12-month-old (**A**) and 23-month-old (**B**) G2019S KI and LRRK2 KO mice in comparison with age-matched WT mice. Optical density (O.D.) of DAT immunostaining was quantified. Representative images were provided in the lower panels Data are means  $\pm$  SEM of n=7–9 mice per group.
